# Supplementary material
Source: publisher figshare collection journal article supplement (https://frontiersin.figshare.com/ndownloader/files/22232658)
Supplement: Supplementary file [file 22232658]

Table S1. Homopolymer sequences upstream of indel loci.

| No. | Base in MinION | Depth in MinION | Base in Illumina | Depth in Illumina | Base in PCR product | Homopolymer sequences upstream of indel loci |
|-----|----------------|-----------------|------------------|-------------------|---------------------|----------------------------------------------|
| 1   | C              | 584             | T                | 31                | T                   | -                                            |
| 2   | T              | 576             | C                | 61                | C                   | -                                            |
| 3   | -              | -               | T                | 77                | T                   | -                                            |
| 4   | C              | 601             | T                | 83                | T                   | -                                            |
| 5   | -              | -               | T                | 76                | T                   | -                                            |
| 6   | A              | 554             | G                | 76                | G                   | -                                            |
| 7   | T              | 517             | C                | 75                | C                   | -                                            |
| 8   | -              | -               | A                | 94                | A                   | -                                            |
| 9   | -              | -               | G                | 105               | G                   | CCGAGGGGGG                                   |
| 10  | C              | 436             | -                | -                 | -                   | TCCTCCCC                                     |
| 11  | -              | -               | C                | 117               | C                   | CTCTCCCC                                     |
| 12  | T              | 544             | -                | -                 | -                   | TGGCTTTTT                                    |
| 13  | -              | -               | G                | 78                | G                   | -                                            |
| 14  | G              | 538             | -                | -                 | -                   | AGGAGGGGG                                    |
| 15  | -              | -               | T                | 58                | T                   | GTCGTTTTTTTTTTT                              |
| 16  | -              | -               | T                | 75                | T                   | CCTCTTTTTTT                                  |
| 17  | G              | 601             | -                | -                 | -                   | CGGAGGGG                                     |
| 18  | -              | -               | A                | 85                | A                   | TTCTAAAAAAAAAAAAAAAAAAAAA                    |
| 19  | -              | -               | C                | 106               | C                   | CCCGCCCCC                                    |
| 20  | -              | -               | G                | 90                | G                   | GGCTGGGGG                                    |
| 21  | T              | 624             | -                | -                 | -                   | GGACTTTTTTT                                  |
| 22  | C              | 577             | -                | -                 | -                   | -                                            |
| 23  | -              | -               | G                | 66                | G                   | CACCGGGGG                                    |
| 24  | G              | 628             | -                | -                 | -                   | -                                            |
| 25  | -              | -               | G                | 77                | G                   | GCTTGGGGGG                                   |
| 26  | -              | -               | C                | 106               | C                   | AACTCCCCC                                    |
| 27  | G              | 653             | A                | 66                | A                   | -                                            |
| 28  | A              | 623             | -                | -                 | -                   | AGGCAAA                                      |
| 29  | -              | -               | A                | 51                | A                   | TAATGGG                                      |
| 30  | -              | -               | G                | 34                | G                   | CAGGAAAAA                                    |
| 31  | -              | -               | T                | 22                | T                   | GCACTTTTT                                    |

Notes: “-” indicates a deletion in the sequence or not applicable in sequencing depth or no homopolymer sequence detected.
